# Supplementary material for: Biomarkers Improve Diagnostics of Sepsis in Adult Patients With Suspected Organ Dysfunction Based on the Quick Sepsis-Related Organ Failure Assessment (qSOFA) Score in the Emergency Department*
Source: PubMed Central journal article supplement — Crit Care Med. 2024 Feb 7;52(6):887–99. doi: 10.1097/CCM.0000000000006216 (PMC11093432; doi:10.1097/ccm.0000000000006216), 2024-02-07
Supplement: ccm-52-0887-s001.pdf [file ccm-52-0887-s001.pdf]

Supplemental digital content to

**Biomarkers improve diagnostics of sepsis in adult patients with suspected organ dysfunction based on the qSOFA score in the emergency department – results from the prospective observational LifePOC study**

Myrto Bolanaki\*<sup>1</sup>, Johannes Winning, MD\*<sup>2</sup>, Anna Slagman, PhD<sup>1</sup>, Thomas Lehmann, PhD<sup>3</sup>, Michael Kiehntopf, MD PhD<sup>4</sup>, Angelika Stacke, MSc<sup>2</sup>, Caroline Neumann, MD<sup>2</sup>, Konrad Reinhart, MD<sup>5</sup>, Martin Möckel, MD FESC FAHA<sup>#1</sup>, and Michael Bauer, MD<sup>#2</sup>

\*,#shared authorships

<sup>1</sup>Department of Emergency and Acute Medicine, Campus Virchow and Mitte, Charité—Universitätsmedizin Berlin, Augustenburger Platz 1, 13353 Berlin, Germany

<sup>2</sup>Department of Anaesthesiology and Intensive Care Medicine, Jena University Hospital, Am Klinikum 1, 07747 Jena, Germany

<sup>3</sup>Center for Clinical Studies, Jena University Hospital, Am Klinikum 1, 07747 Jena, Germany

<sup>4</sup>Institute of Clinical Chemistry and Laboratory Diagnostics and Integrated Biobank Jena (IBBJ), Jena University Hospital, Am Klinikum 1, 07747 Jena, Germany

<sup>5</sup>Department of Anaesthesiology and Intensive Care Medicine, Charité-Universitätsmedizin Berlin, Augustenburger Platz 1, 13353 Berlin, Germany

**Table of contents:**

|                                                                                                                                                                                      |   |
|--------------------------------------------------------------------------------------------------------------------------------------------------------------------------------------|---|
| <b>Methods glossary:</b> LASSO regression .....                                                                                                                                      | 2 |
| <b>eTable 1:</b> Conversion tables for imputation of respiratory SOFA score with SpO <sub>2</sub> /FiO <sub>2</sub> ratios                                                           | 3 |
| <b>eFigure 1:</b> Calibration of the model including PCT as a predictor of sepsis within 96h, comparison of predicted probabilities (deciles) and observed probabilities .....       | 4 |
| <b>eFigure 2:</b> Calibration of the model including PCT as a predictor of septic shock within 96h, comparison of predicted probabilities (deciles) and observed probabilities ..... | 5 |
| <b>eFigure 3:</b> Subgroup ROC analysis (immunocompromised patients).....                                                                                                            | 6 |
| <b>eFigure 4:</b> Calibration of the model including PCT as a predictor of hospital admission, comparison of predicted probabilities (deciles) and observed probabilities.....       | 7 |
| <b>eFigure 5:</b> ROC Analysis – AUC of PCT and/or Lactate to qSOFA for the primary endpoint sepsis within 96h .....                                                                 | 8 |

## LASSO regression

LASSO (least absolute shrinkage and selection operator) is a regression analysis method which performs variable selection in order to minimize the prediction error. This is achieved by imposing a constraint on the model parameters shrinking the regression coefficients towards zero, that is by forcing the sum of the absolute value of the regression coefficients to be less than a fixed value  $\lambda$ . Considering a linear regression with  $p$  potential predictors  $x_{ij}$  and outcome values  $y_i$  for  $i=1, \dots, n$  and  $j=1, \dots, p$  the LASSO algorithm performs the minimization of

$$\sum_{i=1}^n \left( y_i - \sum_{j=1}^p x_{ij} \beta_j \right)^2 + \lambda \sum_{j=1}^p |\beta_j|, \text{ (Tibshirani, R. (2011))}$$

For binary outcomes (sepsis, septic shock) a logit link function was applied in the model. Variables with a regression coefficient  $\beta_j$  of zero after shrinkage are excluded from the model. In this way the complexity of the model will be reduced, including only the variables that are predictive for the outcome variable. Reducing the number of variables in the final model also prevents the issue of overfitting. Traditional approaches like stepwise selection methods (e.g. backward elimination and forward selection procedures) are also capable of identifying a subset of relevant variables, however, the resulting final model depends on the order of the variables which are entered or removed. In LASSO regression all potential variables are entered simultaneously, which avoids this problem and therefore should be preferred for variable selection instead of conventional approaches. (Greenwood, C. J. (2020)).

Tibshirani, R. (2011): Regression Shrinkage and Selection via The Lasso: A Retrospective. *Journal of the Royal Statistical Society Series B: Statistical Methodology*, Volume 73, Issue 3, June 2011, 273–282.

Greenwood, C. J. et al. "A comparison of penalised regression methods for informing the selection of predictive markers." *PloS one* 15.11 (2020): e0242730.

**eTable 1:** Conversion tables for imputation of respiratory SOFA score with SpO<sub>2</sub>/FiO<sub>2</sub> ratios

**Conversion table for calculating the oxygenation index**

| O <sub>2</sub> saturation conversion table |                                            |
|--------------------------------------------|--------------------------------------------|
| SpO <sub>2</sub> (%)                       | Calculated arterial PO <sub>2</sub> (mmHg) |
| 80                                         | 44                                         |
| 81                                         | 45                                         |
| 82                                         | 46                                         |
| 83                                         | 47                                         |
| 84                                         | 49                                         |
| 85                                         | 50                                         |
| 86                                         | 52                                         |
| 87                                         | 53                                         |
| 88                                         | 55                                         |
| 89                                         | 57                                         |
| 90                                         | 60                                         |
| 91                                         | 62                                         |
| 92                                         | 65                                         |
| 93                                         | 69                                         |
| 94                                         | 73                                         |
| 95                                         | 79                                         |
| 96                                         | 86                                         |
| 97                                         | 96                                         |
| 98                                         | 112                                        |
| 99                                         | 145                                        |

**FiO<sub>2</sub> during oxygen therapy**

| Method                     | O <sub>2</sub> -Flow | Estimated FiO <sub>2</sub> |
|----------------------------|----------------------|----------------------------|
| Nasal cannula              | 1                    | 0,24                       |
|                            | 2                    | 0,28                       |
|                            | 3                    | 0,32                       |
|                            | 4                    | 0,36                       |
|                            | 5                    | 0,40                       |
|                            | 6                    | 0,44                       |
| Nasopharyngeal catheter    | 4                    | 0,40                       |
|                            | 5                    | 0,50                       |
|                            | 6                    | 0,60                       |
| Facial mask                | 5                    | 0,40                       |
|                            | 6–7                  | 0,50                       |
|                            | 7–8                  | 0,60                       |
| Facial mask with reservoir | 6                    | 0,60                       |
|                            | 7                    | 0,70                       |
|                            | 8                    | 0,80                       |
|                            | 9                    | 0,90                       |
|                            | 10                   | 0,95                       |

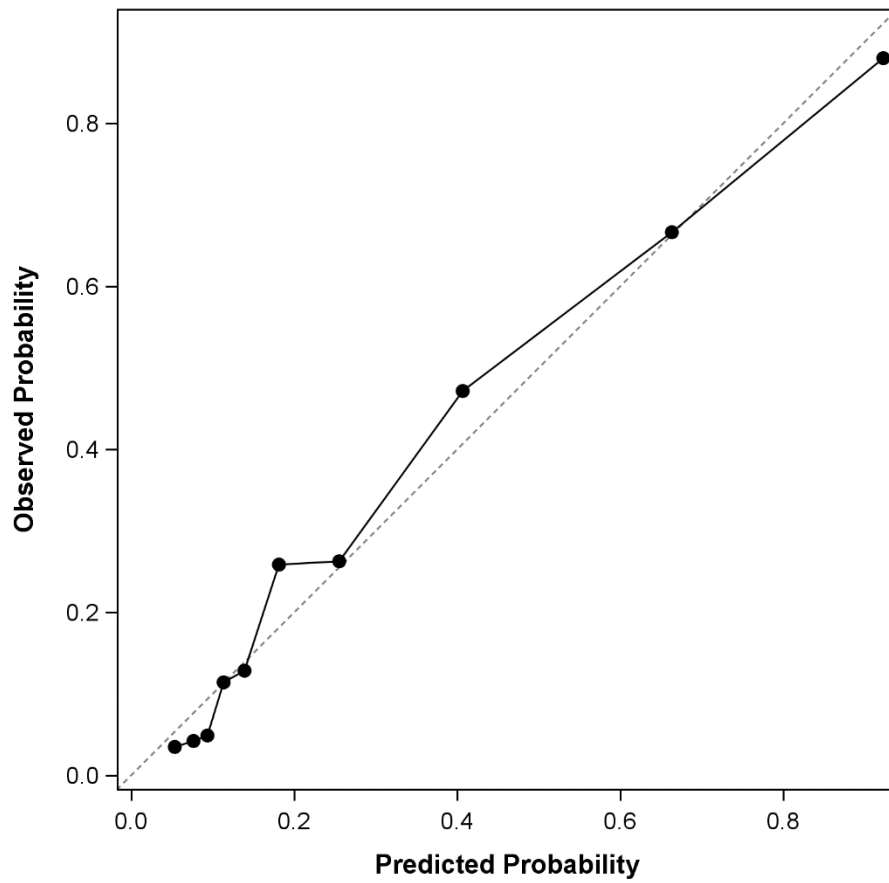

**eFigure 1:** Calibration of the model including PCT as a predictor of sepsis within 96h, comparison of predicted probabilities (deciles) and observed probabilities

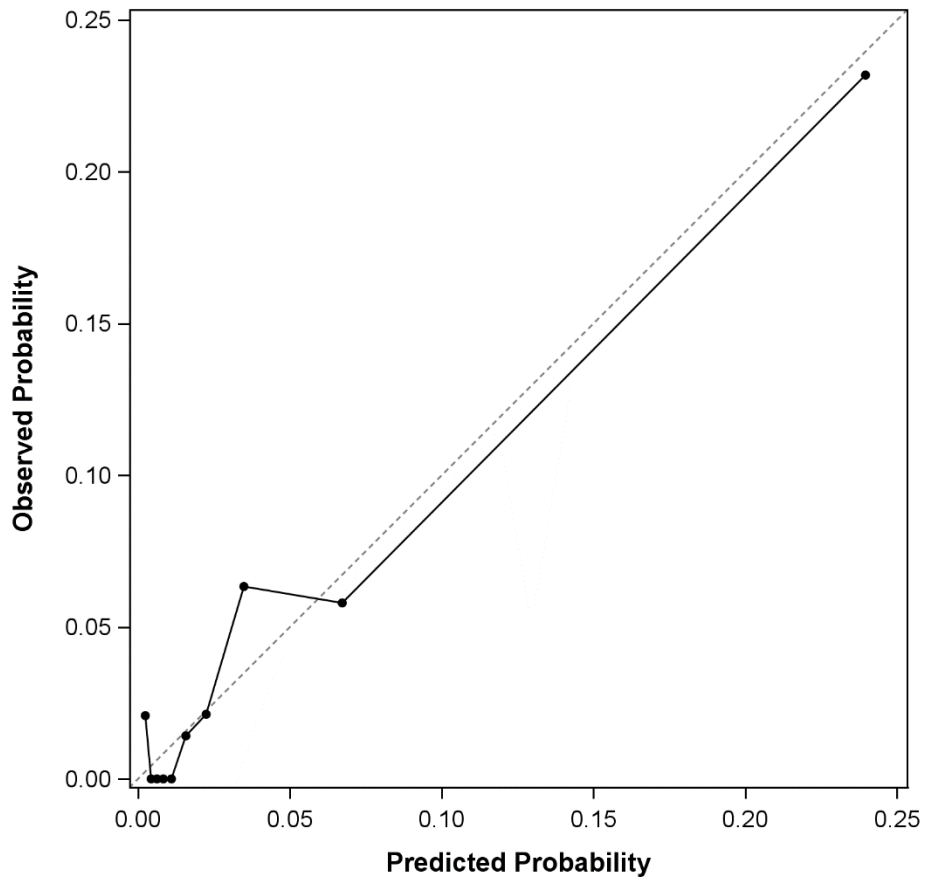

**eFigure 2:** Calibration of the model including PCT as a predictor of septic shock within 96h, comparison of predicted probabilities (deciles) and observed probabilities

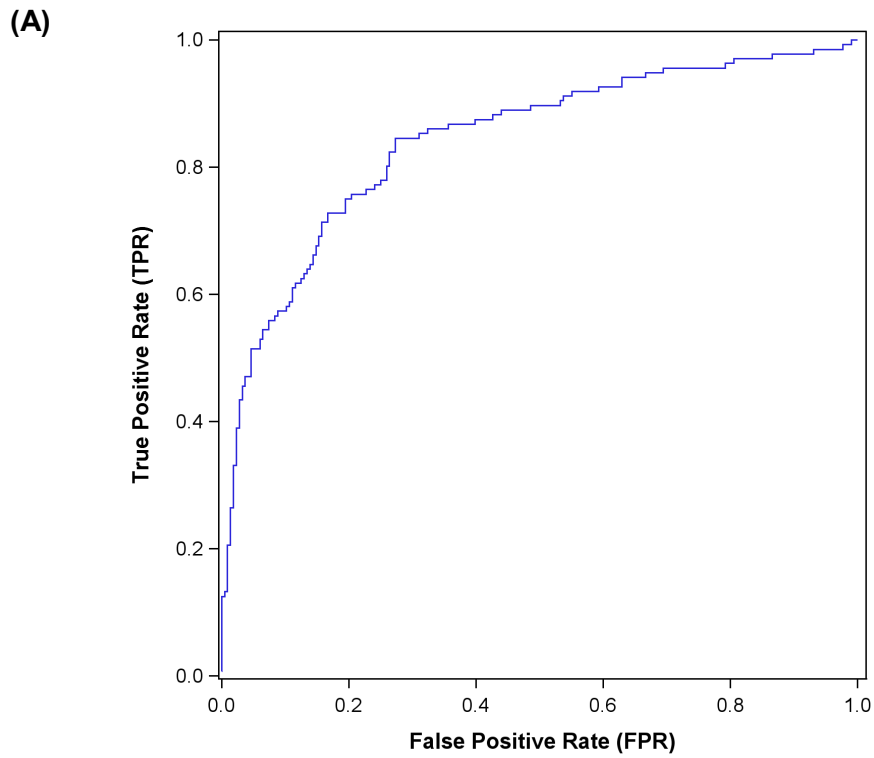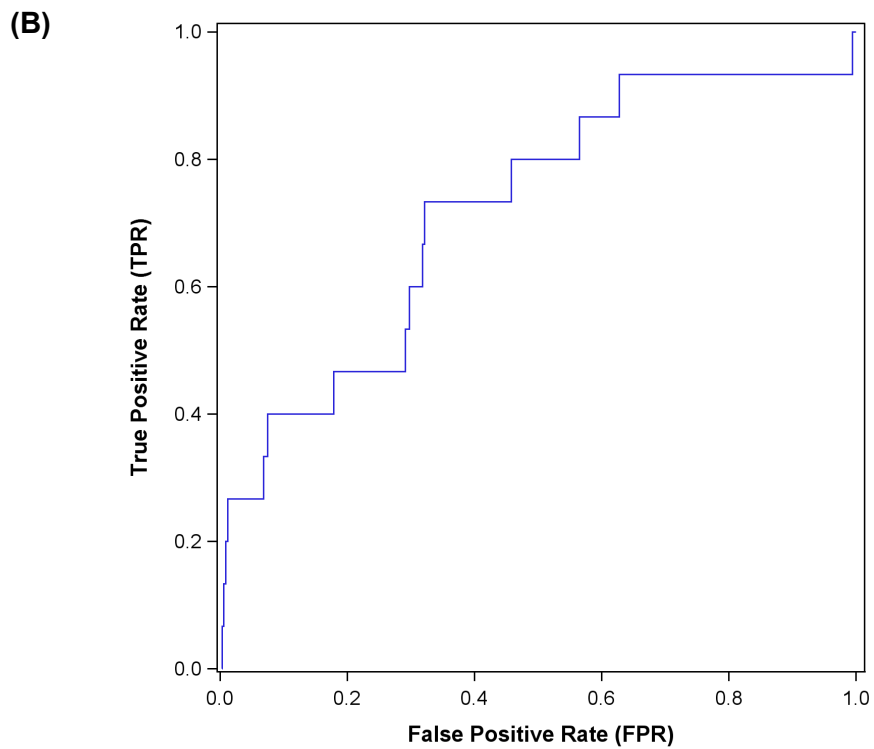

**eFigure 3:** Subgroup ROC analysis (immunocompromised patients). **(A)** AUC of PCT for the primary endpoint sepsis within 96h. **(B)** AUC of combined predictors PCT and proADM for the secondary endpoint septic shock 96h.

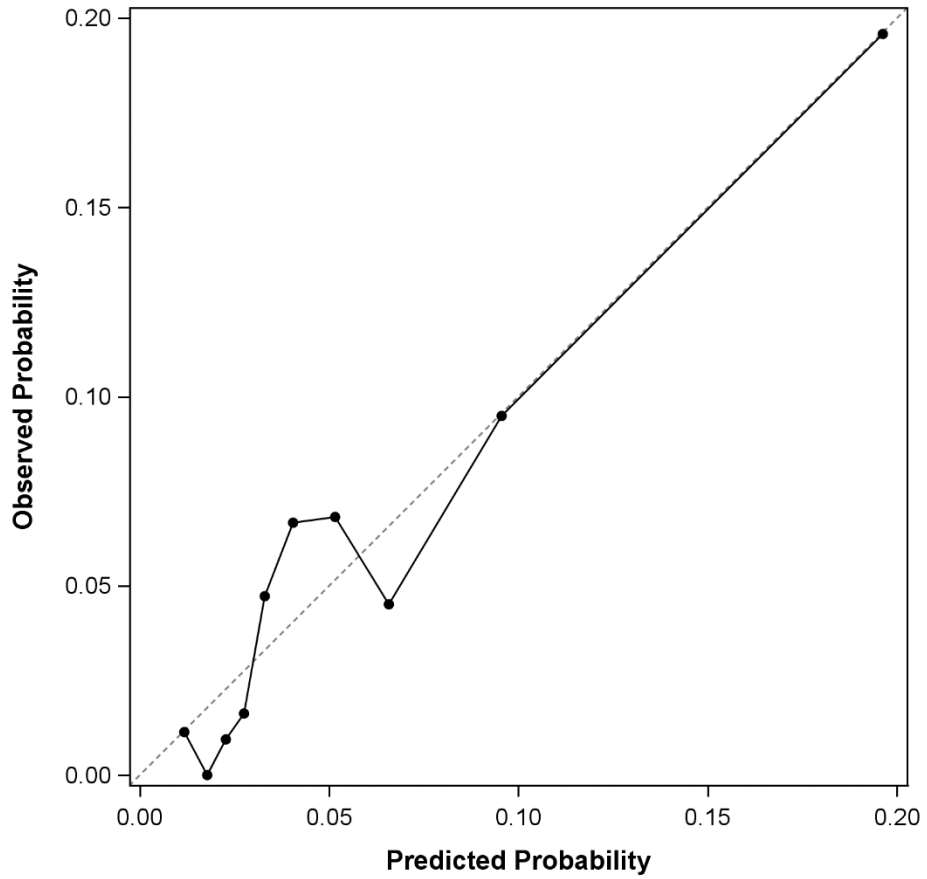

**eFigure 4:** Calibration of the model including PCT as a predictor of hospital admission, comparison of predicted probabilities (deciles) and observed probabilities

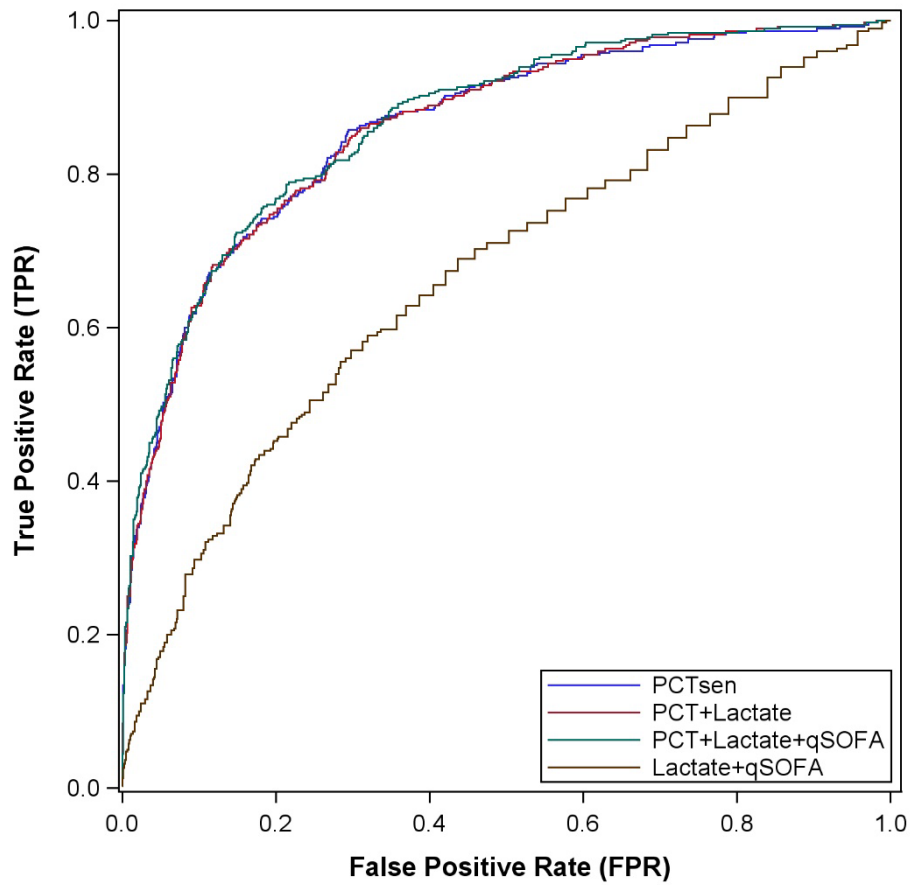

**eFigure 5:** ROC Analysis – AUC of PCT and/or Lactate to qSOFA for the primary endpoint sepsis within 96h
